# Supplementary material for: Touch-sensitive yellow organic mechanophosphorescence and a versatile strategy for white organic mechanoluminescence
Source: Royal Society of Chemistry journal article supplement (doi:10.1039/d1qm00496d), 2021-01-01
Supplement: d1qm00496d1.pdf [file d1qm00496d1.pdf]

## Electronic Supporting Information

### Touch-sensitive yellow organic mechanophosphorescence and the versatile strategy for white organic mechanoluminescence

Lingtai Yue, Yaguang Wang, Jie Ma, Shou Yuan, Shanfeng Xue, Qikun Sun,\* Wenjun Yang\*

Key Laboratory of Rubber-plastics of Ministry of Education/Shandong Province (QUST), School of Polymer Science & Engineering, Qingdao University of Science & Technology, 53-Zhengzhou Road, Qingdao, 266042, P. R. China. E-mail: ywjph2004@qust.edu.cn, sunqikun303@163.com.

#### Table of Contents

|                                       |    |
|---------------------------------------|----|
| Table of Contents.....                | 1  |
| General method.....                   | 2  |
| Synthesis and Characterization.....   | 2  |
| Supplementary Figures and Tables..... | 4  |
| NMR Spectra.....                      | 11 |
| Reference.....                        | 14 |

## General method

$^1\text{H}$  and  $^{13}\text{C}$  NMR spectra were recorded on a Bruker AC500 spectrometer at 500 MHz and 125 MHz, respectively, using deuterated chloroform or deuterated dimethyl sulfoxide as the solvent and tetramethylsilane (TMS) as the internal standard. High performance liquid chromatography (HPLC) was performed on an Essentia LC-16. The running rate was 1 ml/min. Photofluorescence and phosphorescence emission spectra were recorded on Hitachi F-4600 spectrophotometers. Fluorescence and phosphorescence decay curves were recorded by a Hamamatsu compact fluorescence lifetime spectrometer (FLS-1000). The lifetimes ( $\tau$ ) of the luminescence were obtained by fitting the decay curve with a multi-exponential decay function of

$$R(t) = \sum_i B_i e^{-\frac{t}{\tau_i}} \quad (\text{S1})$$

where  $B_i$  and  $\tau_i$  represent the amplitudes and lifetimes of the individual components for multi-exponential decay profiles, respectively.

The digital photographs were captured by the FDR-AX700 4K HDR digital cameras (SONY, Japan). Elemental analysis was characterized using a Flash EA 1112 instrument. Absolute PL quantum yields (PLQY) were determined with a spectrometer C11347 (Hamamatsu, Japan). The RTP yields were generally obtained by peak-differentiation-imitating analysis from the delay PL spectrum, the transient PL spectra and the absolute total quantum yield ( $\Phi$ ). By peak-differentiation-imitating analysis, the RTP ratio can be identified, and from  $\Phi$ , both fluorescent and RTP yields can be figured out. As illustrated in Equation S2,  $\Phi$  is obtained by photon counting from the excitation source into an integration sphere with the ratio of photons emitted:

(S2)

In this equation,  $N^{\text{em}}$  is the number of emitted photons and  $N^{\text{abs}}$  is the number of absorbed photons.

## Synthesis and Characterization

Scheme S1. The synthetic route of OCN and BCPC.

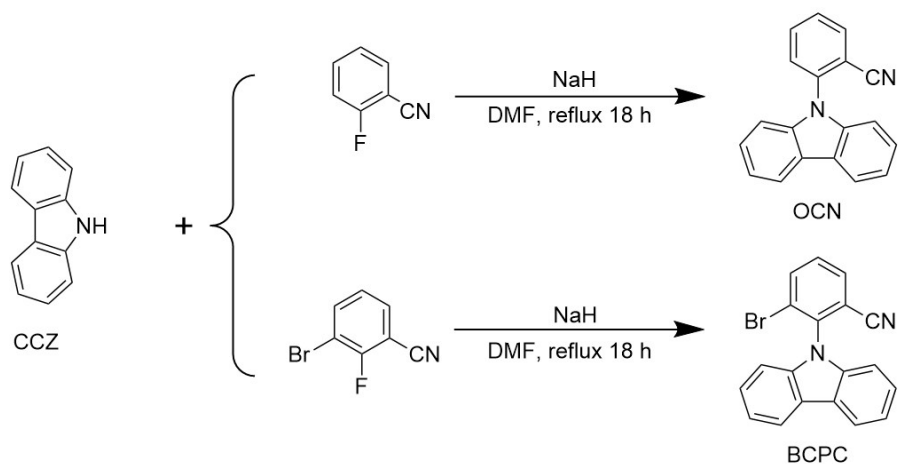

**N-(2-cyanophenyl)carbazole (OCN).** In a 100 ml bottom commercial 9H-carbazole (CCZ, 1.50 g, 8.97 mmol) and NaH (0.43 g, 17.94 mmol) in DMF (50 ml) was stirred at 0 °C for 1 h. 2-fluorobenzonitrile (1.73 g, 9.87 mmol) was added in the mixture and stirred at 150 °C for 18 h. After cooling, the reaction mixture was extracted with ethyl acetate, the combined organic layer dried with anhydrous  $\text{MgSO}_4$ , filtered and concentrated in vacuo. The crude product was purified by silica-gel column chromatography using petroleum ether/ dichloromethane (5:2 v/v), yielding a white solid (1.93 g, Yield 80%).  $^1\text{H}$  NMR (500 MHz,  $\text{CDCl}_3$ )  $\delta$  8.15

(dt,  $J = 7.7, 1.0$  Hz, 2H), 7.96 (dd,  $J = 8.1, 1.6$  Hz, 1H), 7.84 (td,  $J = 7.8, 1.6$  Hz, 1H), 7.67–7.59 (m, 2H), 7.43 (ddd,  $J = 8.2, 7.1, 1.2$  Hz, 2H), 7.33 (td,  $J = 7.5, 1.0$  Hz, 2H), 7.21 (dd,  $J = 8.1, 0.9$  Hz, 2H).  $^{13}\text{C}$  NMR (126 MHz,  $\text{CDCl}_3$ )  $\delta$  140.70, 140.60, 134.49, 134.26, 129.67, 128.43, 126.17, 123.87, 120.76, 120.52, 115.98, 112.85, 109.65. Anal. Calcd. For  $\text{C}_{19}\text{H}_{12}\text{N}_2$ : C, 85.05; H, 4.51; N, 10.44. Found: C, 85.08; H, 4.52; N, 10.42.

**N-(2-bromo-5-cyano)phenyl-carbazole (BCPC).** The BCPC was prepared following the same procedure of OCN by using 3-bromo-2-fluorobenzonitrile. The eluent is petroleum ether/ dichloromethane (4:1 v/v), yielding a white solid (2.59 g, Yield 83%).  $^1\text{H}$  NMR (500 MHz,  $\text{CDCl}_3$ )  $\delta$  8.16 (d,  $J = 7.7$  Hz, 2H), 8.09 (d,  $J = 8.1$  Hz, 1H), 7.89 (d,  $J = 7.7$  Hz, 1H), 7.55 (t,  $J = 8.0$  Hz, 1H), 7.43 (t,  $J = 7.6$  Hz, 2H), 7.34 (t,  $J = 7.4$  Hz, 2H), 6.98 (d,  $J = 8.1$  Hz, 2H).  $^{13}\text{C}$  NMR (126 MHz,  $\text{CDCl}_3$ )  $\delta$  140.04, 139.44, 138.65, 133.20, 130.44, 126.32, 126.01, 123.87, 120.89, 120.73, 116.53, 114.84, 109.55. Anal. Calcd. For  $\text{C}_{19}\text{H}_{11}\text{BrN}_2$ : C, 65.73; H, 3.19; Br, 23.01; N, 8.07. Found: C, 65.74; H, 3.20; N, 8.06.

**Scheme S2. The synthetic route of L-CZ, L-OCN and L-BCPC.**

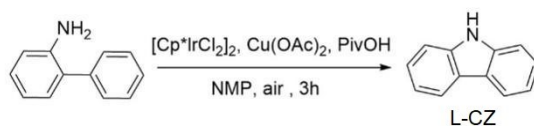

**Lab-carbazole (L-CZ).** In a 100 ml two-necked flask 2-Aminobiphenyl (2.50 g, 14.77 mmol),  $[\text{Cp}^*\text{IrCl}_2]_2$  (0.25 g, 0.31 mmol),  $\text{Cu}(\text{OAc})_2$  (0.54 g, 2.97 mmol), and PivOH (3.05 g, 29.86 mmol) in NMP (50 ml) was stirred under air at  $120^\circ\text{C}$  for 3 h. After cooling, the reaction mixture was extracted with ethyl acetate, the combined organic layer dried with anhydrous  $\text{MgSO}_4$ , filtered and concentrated in vacuo. The crude product was purified by silica-gel column chromatography using petroleum ether/ dichloromethane (5:1 v/v), yielding a white solid (1.31 g, Yield 53%).  $^1\text{H}$  NMR (500 MHz,  $\text{DMSO}-d_6$ )  $\delta$  11.27 (s, 1H), 8.13 (d,  $J = 7.7$  Hz, 2H), 7.51 (d,  $J = 8.1$  Hz, 2H), 7.41 (t,  $J = 7.6$  Hz, 2H), 7.18 (t,  $J = 7.4$  Hz, 2H).  $^{13}\text{C}$  NMR (126 MHz,  $\text{DMSO}-d_6$ )  $\delta$  139.66, 125.44, 122.34, 120.08, 118.42, 110.87. Anal. Calcd. For  $\text{C}_{12}\text{H}_9\text{N}$ : C, 86.20; H, 5.43; N, 8.38. Found: C, 86.24; H, 5.40; N, 8.35.

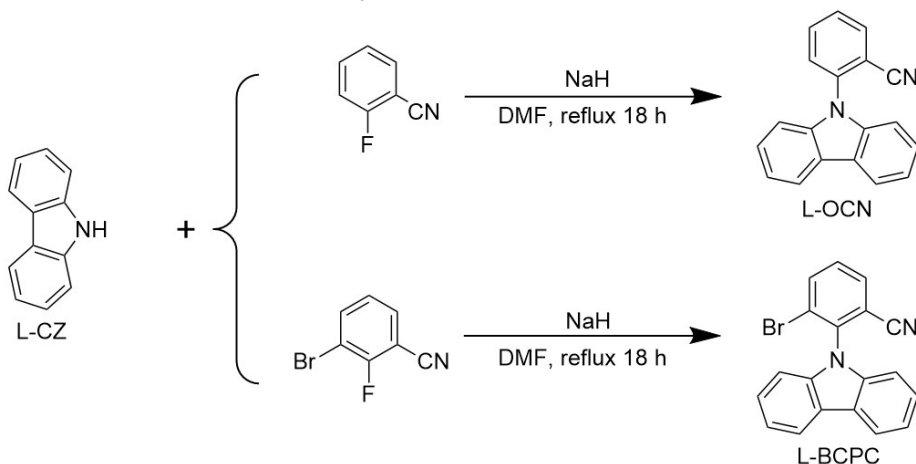

**Lab-N-(2-cyanpphenyl)carbazole (L-OCN).** In a 100 ml bottom commercial 9H-carbazole (L-CZ, 1.50 g, 8.97 mmol) and NaH (0.43 g, 17.94 mmol) in DMF (50 ml) was stirred at  $0^\circ\text{C}$  for 1 h. 2-fluorobenzonitrile (1.73 g, 9.87 mmol) was added in the mixture and stirred at  $150^\circ\text{C}$  for 18 h. After cooling, the reaction mixture was extracted with ethyl acetate, the combined organic layer dried with anhydrous  $\text{MgSO}_4$ , filtered and concentrated in vacuo. The crude product was purified by silica-gel column chromatography using petroleum ether/ dichloromethane (5:2 v/v), yielding a white solid (1.95 g, Yield 81%).  $^1\text{H}$  NMR (500 MHz,  $\text{CDCl}_3$ )  $\delta$  8.15 (dt,  $J = 7.8$  Hz, 2H), 7.98–7.94 (m, 1H), 7.84 (td,  $J = 7.8, 1.5$  Hz, 1H), 7.65–7.61 (m, 2H), 7.46–7.41 (m, 2H), 7.35–7.31 (m, 2H), 7.21 (d,  $J = 8.2$  Hz, 2H).  $^{13}\text{C}$  NMR (126 MHz,  $\text{CDCl}_3$ )  $\delta$  140.70, 140.60, 134.50, 134.26, 129.67, 128.43, 126.17, 123.87, 120.76, 120.52, 115.98, 112.85, 109.65. Anal. Calcd. For  $\text{C}_{19}\text{H}_{12}\text{N}_2$ : C, 85.05; H, 4.51; N, 10.44. Found: C, 85.06; H, 4.51; N, 10.43.

**Lab-N-(2-bromo-5-cyano)phenyl-carbazole (L-BCPC).** The L-BCPC was prepared following the same procedure of L-OCN by using 3-bromo-2-fluorobenzonitrile. The eluent is petroleum ether/ dichloromethane (4:1 v/v), yielding a white solid (2.56 g, Yield 82%).  $^1\text{H}$  NMR (500 MHz,  $\text{CDCl}_3$ )  $\delta$  8.16 (d,  $J = 7.7$  Hz, 2H), 8.09 (d,  $J = 8.2$  Hz, 1H), 7.89 (d,  $J = 7.8$  Hz, 1H), 7.55 (t,  $J = 8.0$  Hz, 1H), 7.43 (t,  $J = 7.7$  Hz, 2H), 7.34 (t,  $J = 7.5$  Hz, 2H), 6.98 (d,  $J = 8.1$  Hz, 2H).  $^{13}\text{C}$  NMR (126 MHz,  $\text{CDCl}_3$ )  $\delta$  140.04, 139.44, 138.65, 133.20, 130.44, 126.32, 126.01, 123.87, 120.89, 120.73, 116.53, 114.84, 109.55. Anal. Calcd. For  $\text{C}_{19}\text{H}_{11}\text{BrN}_2$ : C, 65.73; H, 3.19; Br, 23.01; N, 8.07. Found: C, 65.72; H, 3.20; N, 8.07.

## Supplementary Figures and Tables

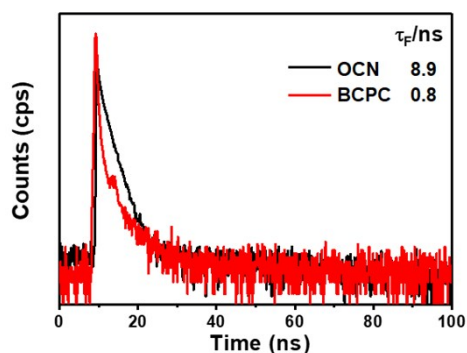

**Figure S1.** Time-resolved emission decay curves of **OCN** and **BCPC** crystal powder fluorescence under ambient conditions.  $\tau_F$  is the fluorescence lifetime.

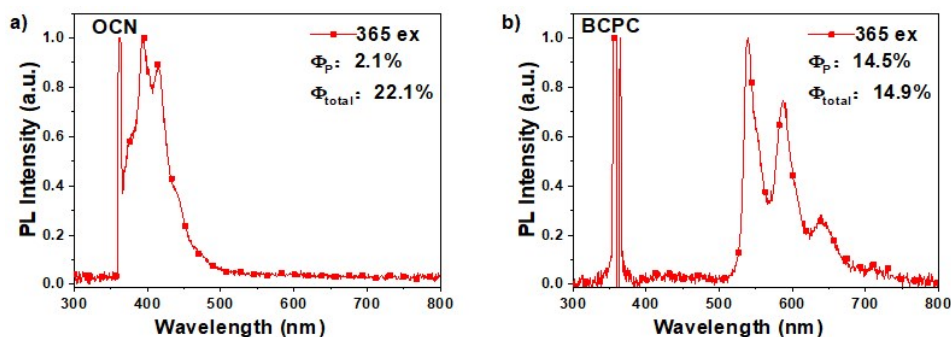

**Figure S2.** The transient PL spectra and the measured total absolute efficiency ( $\Phi_{\text{total}}$ ) and the calculated phosphorescence efficiency ( $\Phi_p$ ) by a PL integration sphere for **OCN** a) and **BCPC** b) crystals under ambient conditions.

Table S1. Crystal Structural data of **OCN** and **BCPC**.

| Compound reference | colorless <b>OCN</b> crystal <sup>1</sup> | colorless <b>BCPC</b> crystal            |
|--------------------|-------------------------------------------|------------------------------------------|
| Chemical formula   | $\text{C}_{19}\text{H}_{12}\text{N}_2$    | $\text{C}_{19}\text{H}_{11}\text{BrN}_2$ |
| Formula weight     | 268.31                                    | 347.21                                   |
| Crystal system     | Orthorhombic                              | Monoclinic                               |
| Space group        | Iba2                                      | P 21                                     |
| a/ Å               | 14.7314(14)                               | 8.338(6)                                 |
| b/ Å               | 24.585(2)                                 | 12.528(9)                                |

|                                           |                                             |                                             |
|-------------------------------------------|---------------------------------------------|---------------------------------------------|
| c/ Å                                      | 8.0451(8)                                   | 14.752(11)                                  |
| $\alpha$ /°                               | 90                                          | 90                                          |
| $\beta$ /°                                | 90                                          | 92.607(13)                                  |
| $\gamma$ /°                               | 90                                          | 90                                          |
| Unit cell volume/ Å <sup>3</sup>          | 2913.7(5)                                   | 1539.2(18)                                  |
| Temperature/K                             | 296                                         | 100                                         |
| Z                                         | 8                                           | 2                                           |
| Density (calculated) / g cm <sup>-3</sup> | 1.223                                       | 1.498                                       |
| F(000)                                    | 1120                                        | 696                                         |
| Theta range for data collection           | 2.765 to 7.571 deg.                         | 2.863 to 25.997 deg.                        |
| Index ranges                              | -19<=h<=18, -32<=k<=24, -10<=l<=10          | -9<=h<=10, -15<=k<=14, -18<=l<=17           |
| Completeness to theta                     | 25.242 99.9%                                | 25.242 99.7%                                |
| Absorption coefficient                    | None                                        | None                                        |
| Max. and min. transmission                | 0.984 and 0.988                             | 0.487 and 0.454                             |
| Refinement method                         | Full-matrix least-squares on F <sup>2</sup> | Full-matrix least-squares on F <sup>2</sup> |
| Data / restraints / parameters            | 3248 / 1 / 190                              | 4872 / 1 / 397                              |
| Goodness-of-fit on F <sup>2</sup>         | 0.968                                       | 0.828                                       |
| CCDC number                               | 1918562                                     | 1980041                                     |

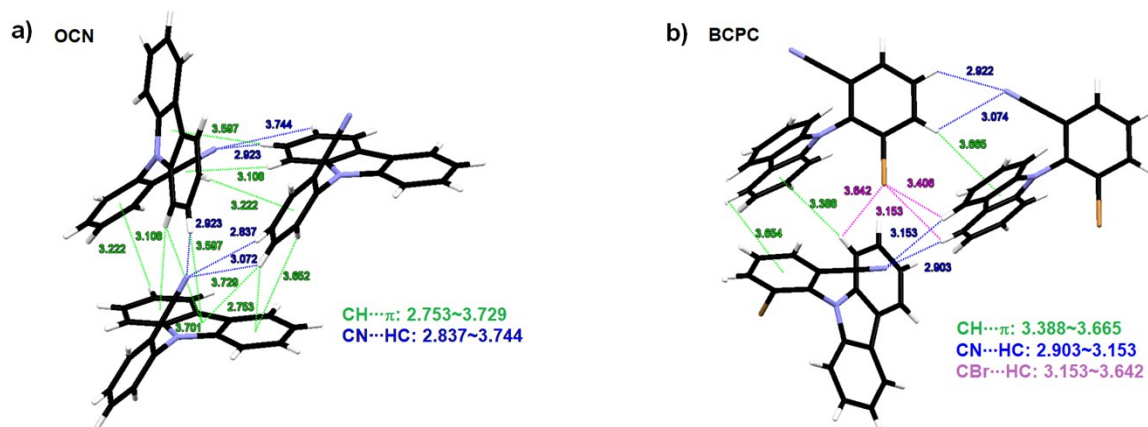

Figure S3. The intermolecular interactions in **OCN** a) and **BCPC** b) crystals.

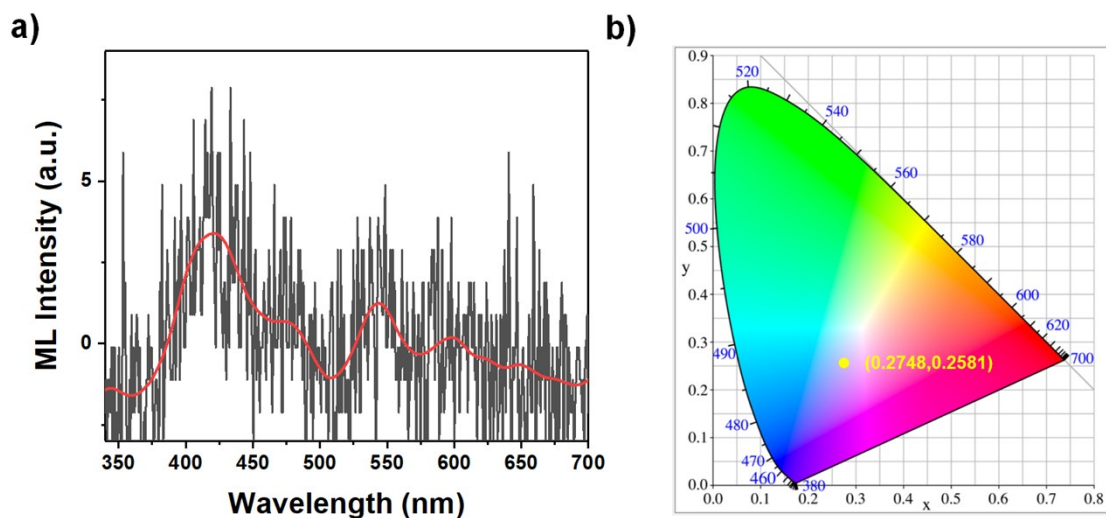

Figure S4. The ML spectrum a) and the ML CIE coordinates b) of the crystalline mixture (10/2) of OCN and BCPC.

Table S2. Summary of photophysical parameters of OCN and BCPC crystals.

| Sample | $\tau_f$ /ns | $\lambda_{ex}$ /nm | $\Phi_f$ /% | $K_f$ /s <sup>-1</sup> | $\tau_p$ /ms | $\Phi_p$ /% | $K_p$ /s <sup>-1</sup> | $K_{nr}$ /s <sup>-1</sup> | $K_{ISC}$ /s <sup>-1</sup> |
|--------|--------------|--------------------|-------------|------------------------|--------------|-------------|------------------------|---------------------------|----------------------------|
| OCN    | 8.9          | 365                | 20          | $2.2 \cdot 10^7$       | 574.2        | 2.1         | $3.7 \cdot 10^{-2}$    | 1.7                       | $2.3 \cdot 10^6$           |
| BCPC   | 0.8          | 365                | 0.4         | $4.9 \cdot 10^6$       | 239.4        | 14.5        | $6.0 \cdot 10^{-1}$    | 3.5                       | $1.8 \cdot 10^8$           |

$\tau_f$ : lifetime of fluorescence;  $\Phi_f$ : absolute quantum yield of fluorescence;  $K_f$ : rate constant of fluorescence;  $\tau_p$ : lifetime of phosphorescence;  $\Phi_p$ : absolute quantum yield of phosphorescence;  $K_p$ : rate constant of phosphorescence;  $K_{nr}$ : rate constant of non-radiative decay of  $T_1$ ;  $K_{ISC}$ : rate constant of intersystem crossing (ISC) from singlet to triplet states.  $K_f = \Phi_f / \tau_f$ ;  $K_p = \Phi_p / \tau_p$ ;  $K_{nr} = (1 - \Phi_p) / \tau_p$ ;  $K_{ISC} = \Phi_p / \tau_f^{2-5}$

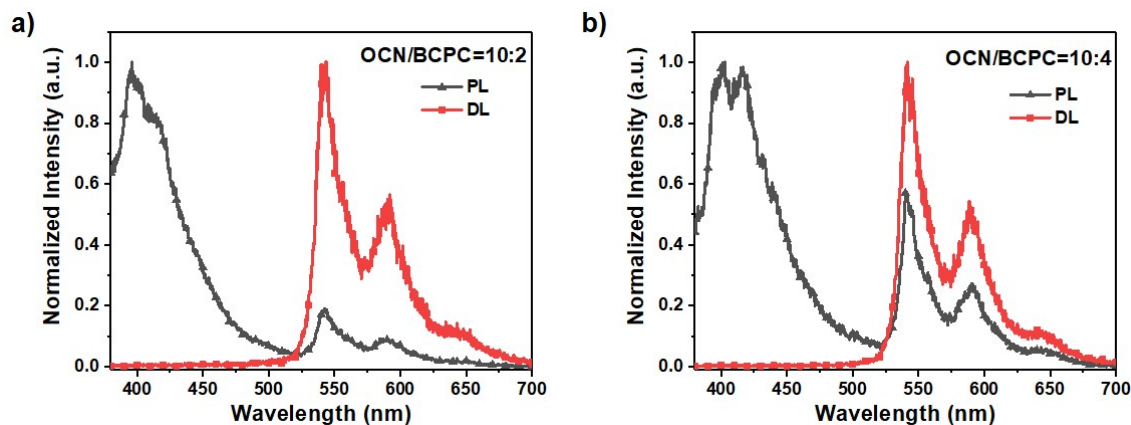

Figure S5. Steady (PL) and delayed (DL) photoluminescence of crystalline mixture (10/2) a) and (10/4) b) of OCN and BCPC.

**Photophysical properties of the L-OCN and L-BCPC in crystalline states:**

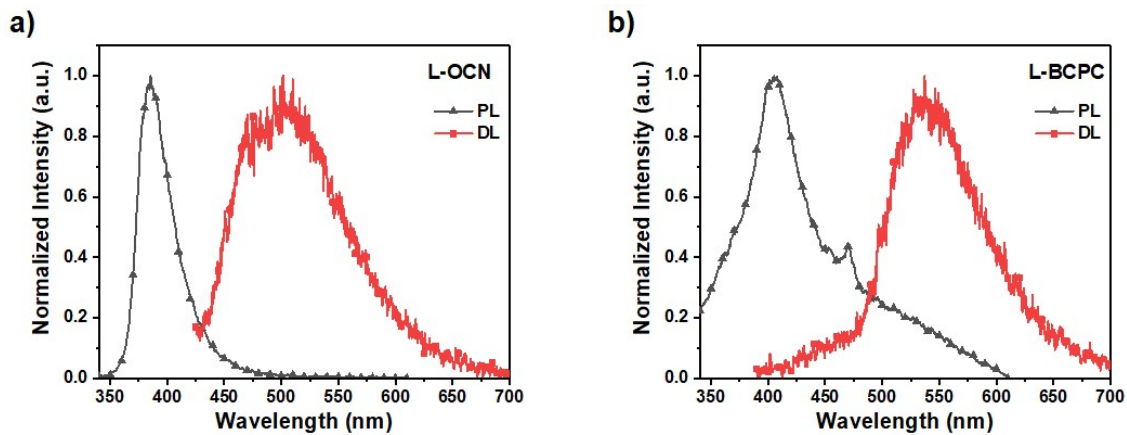

Figure S6. Steady (PL) and delayed (DL) photoluminescence of L-OCN a) and L-BCPC b).

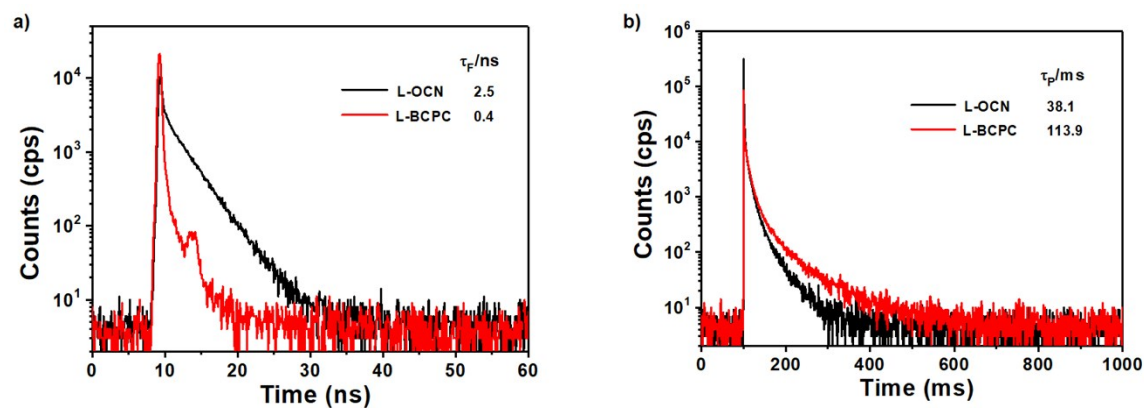

Figure S7. Time-resolved emission decay curves of L-OCN, L-BCPC crystal powder fluorescence a) and phosphorescence b) under ambient conditions.  $\tau_f$  is the fluorescence lifetime, and  $\tau_p$  is the phosphorescence lifetime.

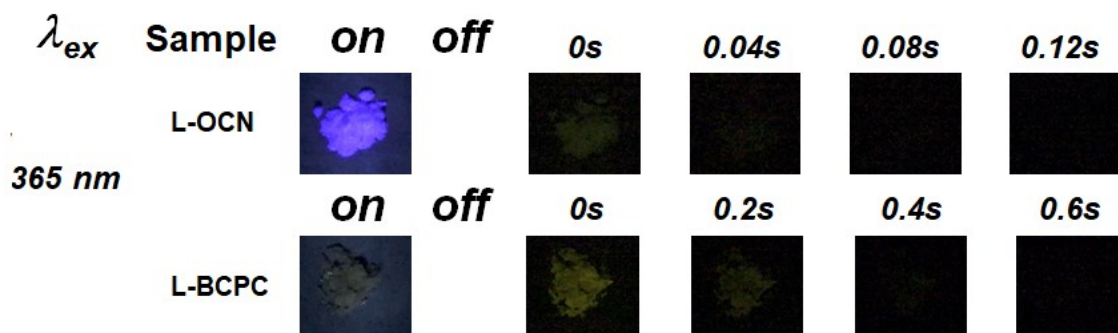

Figure S8. The PL photographs of L-OCN and L-BCPC crystals under 365 nm excitation light before and after removing excitation light in the dark.

a) BCPC

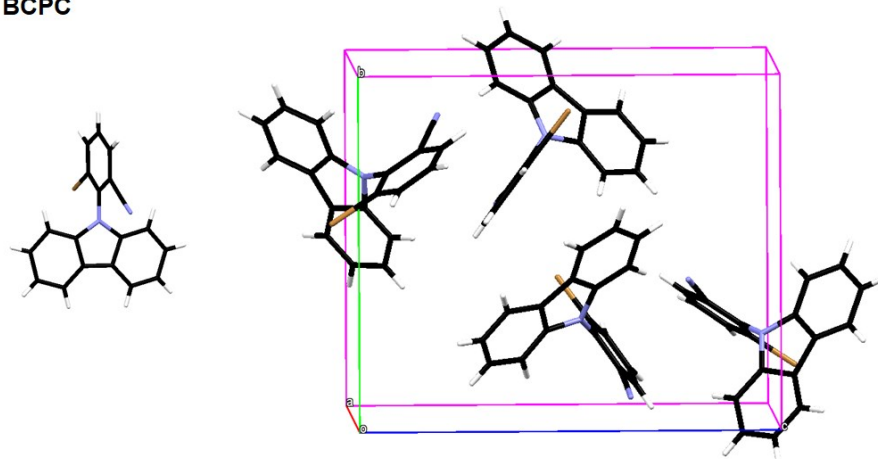

b) L-BCPC

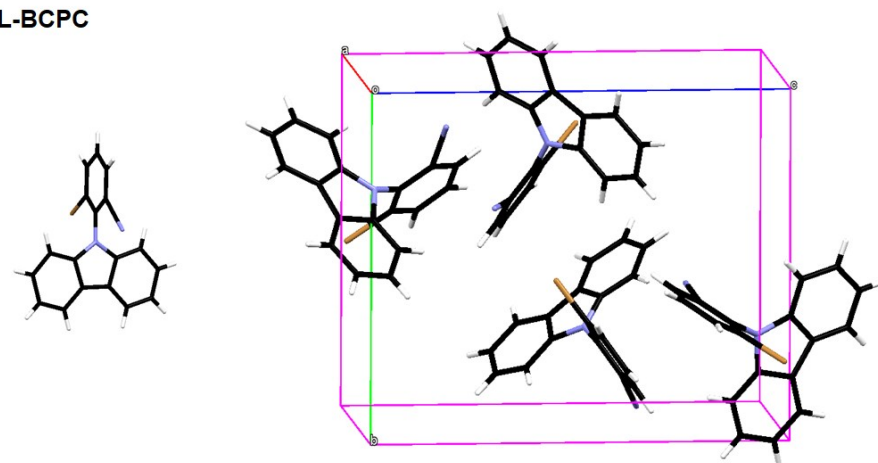

Figure S9. The unit cell structures of BCPC a) and L-BCPC b) single crystal.

Table S3. Crystal Structural data of BCPC and L-BCPC.

| Compound reference | colorless BCPC crystal | colorless L-BCPC crystal |
|--------------------|------------------------|--------------------------|
| Chemical formula   | $C_{19}H_{11}BrN_2$    | $C_{19}H_{11}BrN_2$      |
| Formula weight     | 347.21                 | 347.21                   |
| Crystal system     | Monoclinic             | Monoclinic               |
| Space group        | P 21                   | P 21                     |
| a/ Å               | 8.338(6)               | 8.2827(16)               |
| b/ Å               | 12.528(9)              | 12.474(2)                |
| c/ Å               | 14.752(11)             | 14.700(3)                |
| $\alpha/^\circ$    | 90                     | 90                       |
| $\beta/^\circ$     | 92.607(13)             | 92.458(3)                |
| $\gamma/^\circ$    | 90                     | 90                       |



|                                          |                                             |                                             |
|------------------------------------------|---------------------------------------------|---------------------------------------------|
| Unit cell volume/ Å <sup>3</sup>         | 1539.2(18)                                  | 1517.5(5)                                   |
| Temperature/K                            | 100                                         | 100                                         |
| Z                                        | 2                                           | 2                                           |
| Density (calculated) /g cm <sup>-3</sup> | 1.498                                       | 1.520                                       |
| F(000)                                   | 696                                         | 696                                         |
| Theta range for data collection          | 2.863 to 25.997 deg.                        | 2.773 to 24.999 deg.                        |
| Index ranges                             | -9<=h<=10, -15<=k<=14, -18<=l<=17           | -9<=h<=9, -8<=k<=14, -17<=l<=16             |
| Completeness to theta                    | 25.242 99.7%                                | 24.999 99.8%                                |
| Absorption coefficient                   | None                                        | None                                        |
| Max. and min. transmission               | 0.487 and 0.454                             | 0.614 and 0.542                             |
| Refinement method                        | Full-matrix least-squares on F <sup>2</sup> | Full-matrix least-squares on F <sup>2</sup> |
| Data / restraints / parameters           | 4872 / 1 / 397                              | 4413 / 7 / 397                              |
| Goodness-of-fit on F <sup>2</sup>        | 0.828                                       | 0.984                                       |
| CCDC number                              | 1980041                                     | 2051715                                     |

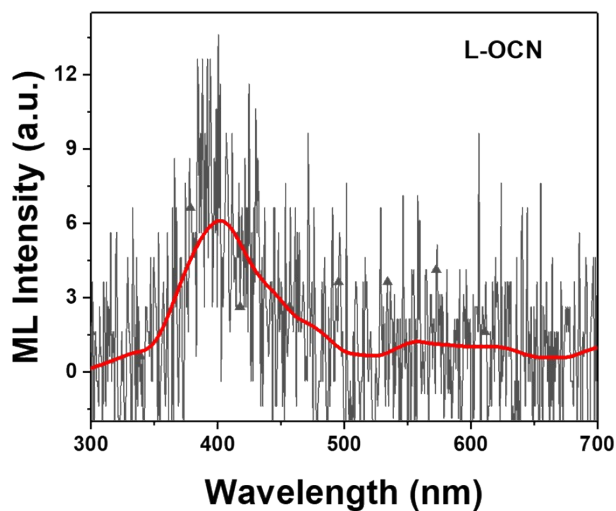

Figure S10. Mechanofluorescence (MF) spectra of L-OCN crystals.

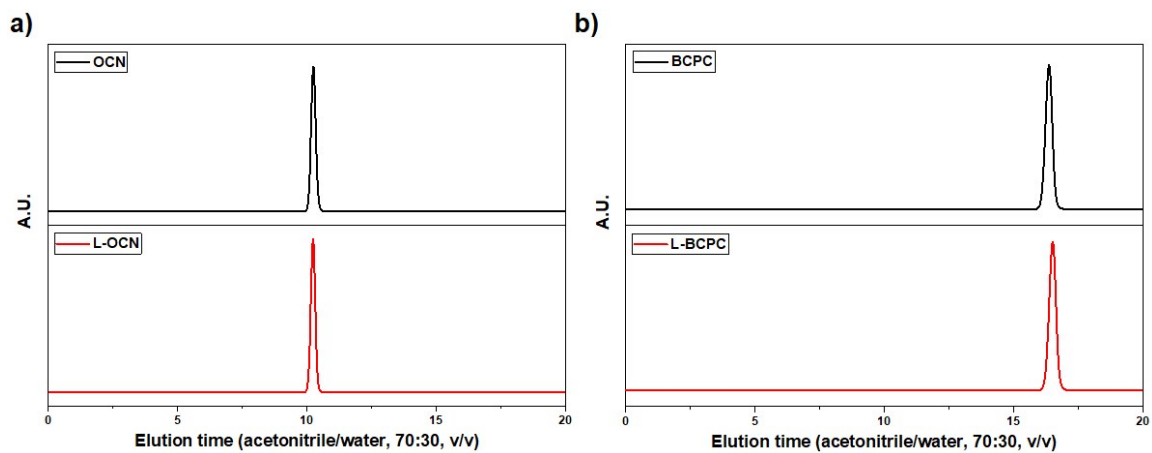

**Figure S11.** a) HPLC spectra of **OCN** and **L-OCN** monitored at the onset absorption of 346 nm with 70/30 acetonitrile (ACN)-water ratio (v/v). b) HPLC spectra of **BCPC** and **L-BCPC** monitored at the onset absorption of 346 nm with 70/30 acetonitrile (ACN)-water ratio (v/v).

## NMR Spectra

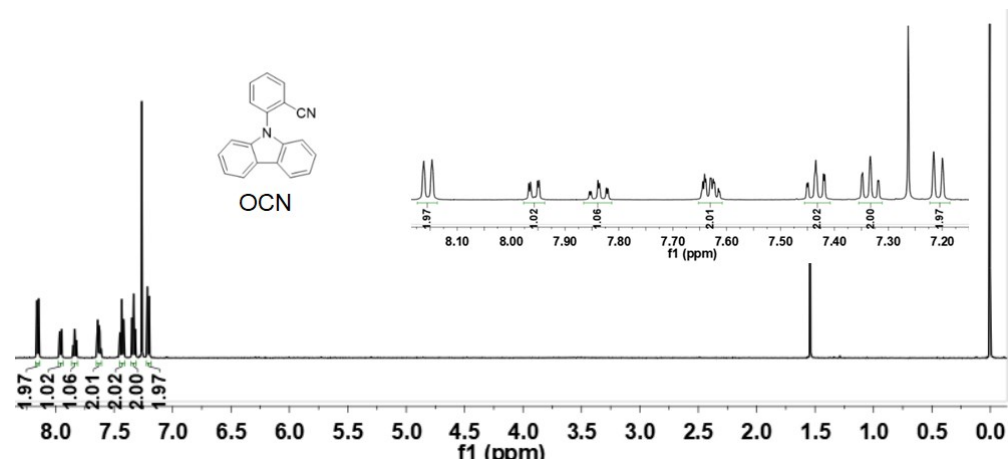

Figure S12. <sup>1</sup>H NMR spectrum of OCN in CDCl<sub>3</sub>.

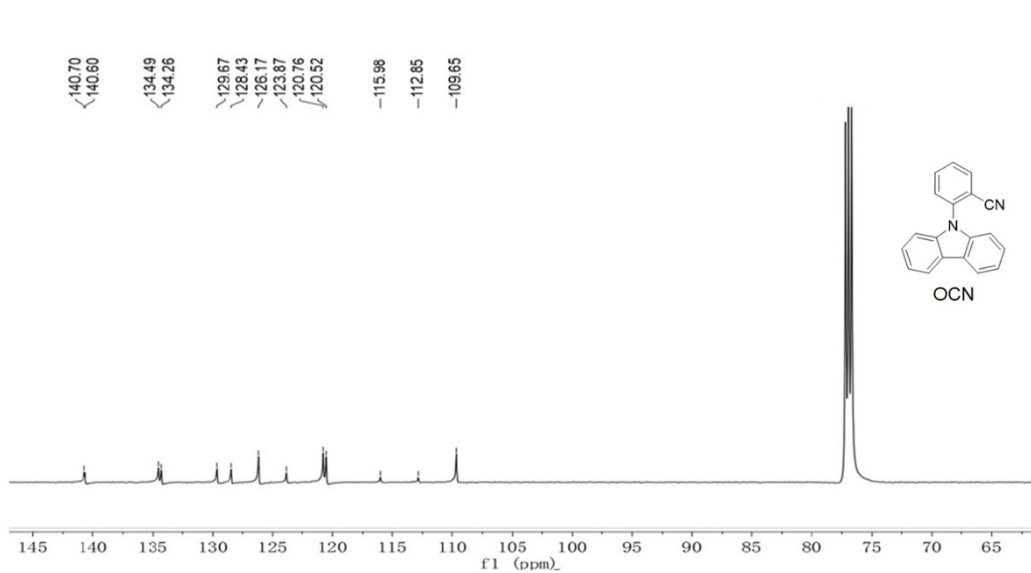

Figure S13. <sup>13</sup>C NMR spectrum of OCN in CDCl<sub>3</sub>.

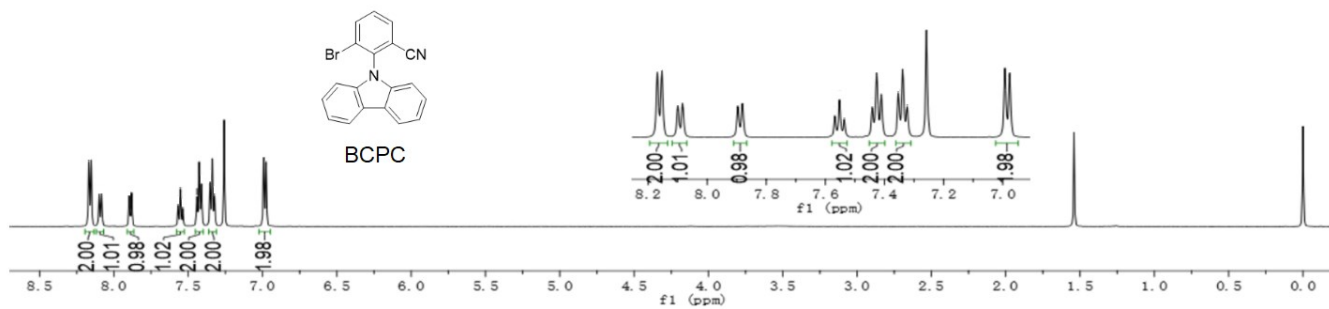

Figure S14. <sup>1</sup>H NMR spectrum of BCPC in CDCl<sub>3</sub>.

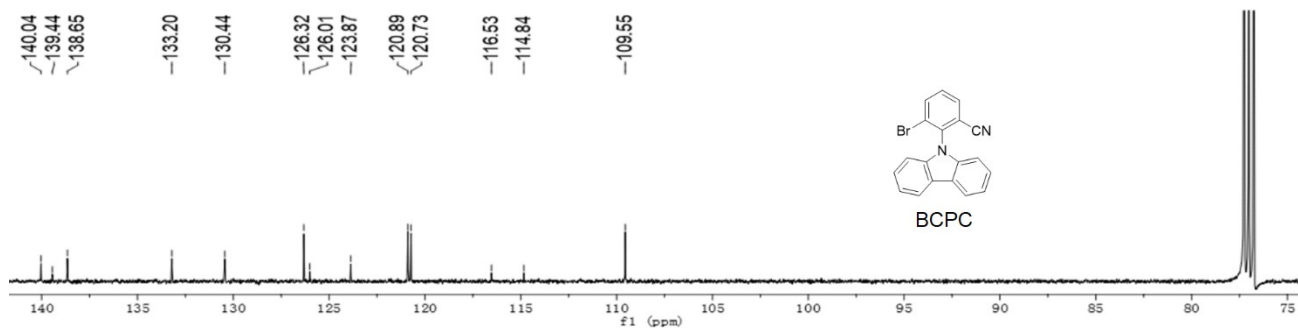

Figure S15. <sup>13</sup>C NMR spectrum of BCPC in CDCl<sub>3</sub>.

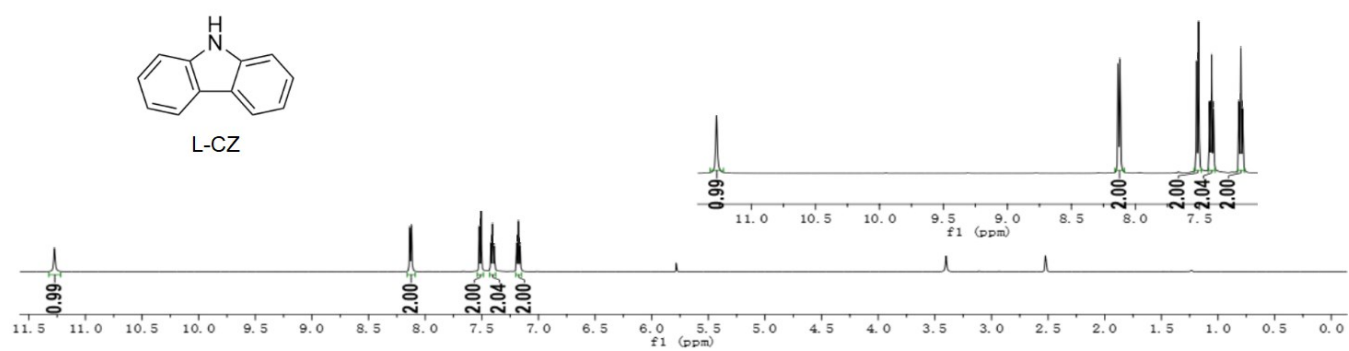

Figure S16. <sup>1</sup>H NMR spectrum of L-CZ in DMSO-*d*<sub>6</sub>.

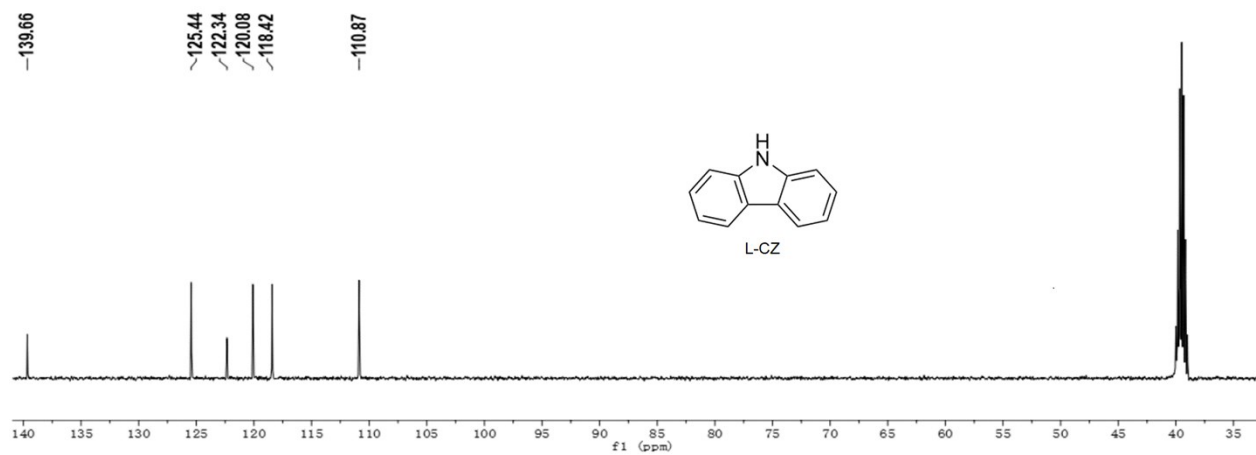

Figure S17. <sup>13</sup>C NMR spectrum of L-CZ in DMSO-*d*<sub>6</sub>.

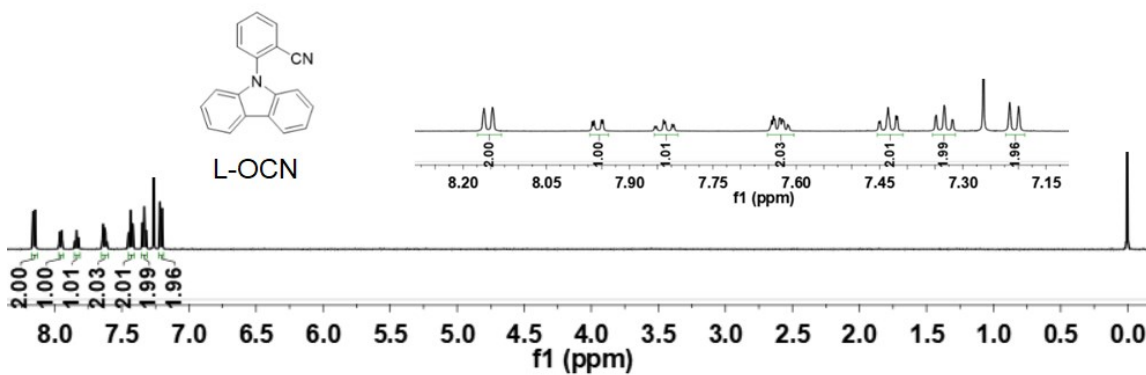

Figure S18. <sup>1</sup>H NMR spectrum of L-OCN in CDCl<sub>3</sub>.

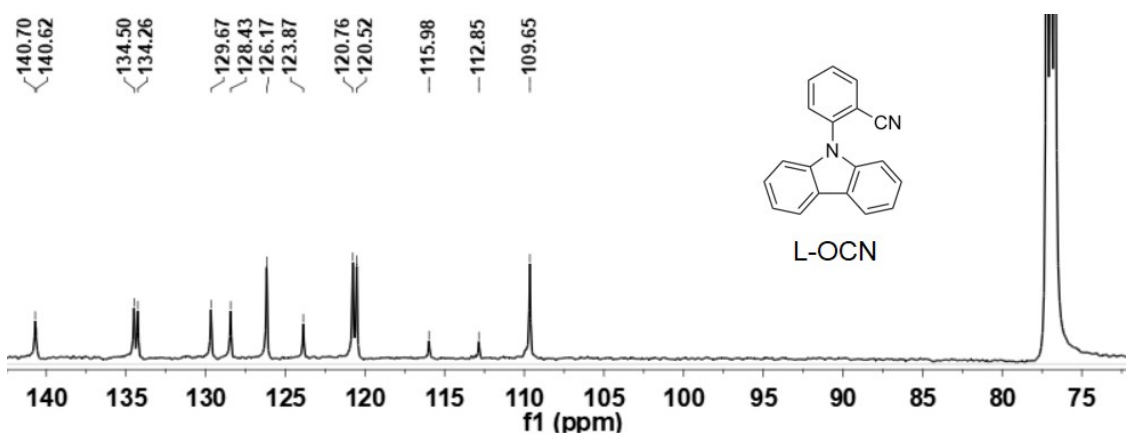

Figure S19. <sup>13</sup>C NMR spectrum of L-OCN in CDCl<sub>3</sub>.

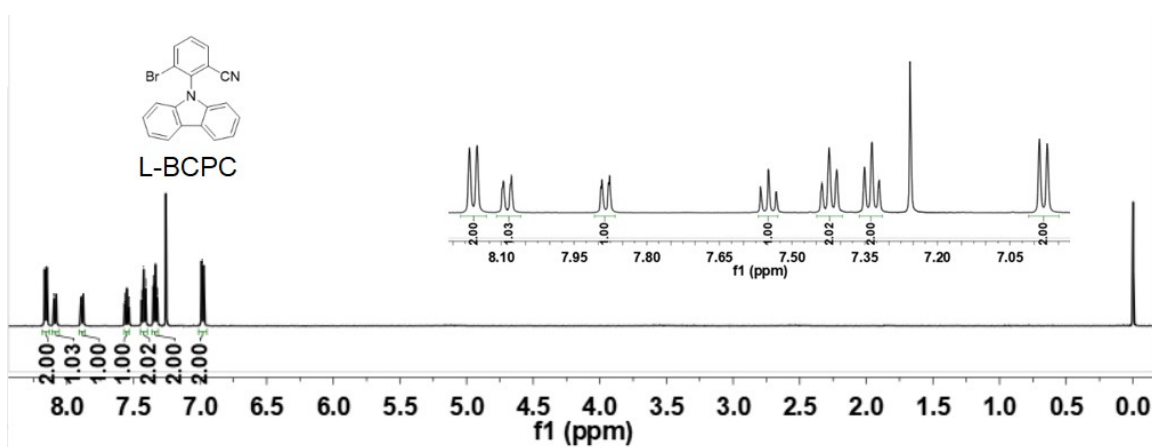

Figure S20. <sup>1</sup>H NMR spectrum of L-BCPC in CDCl<sub>3</sub>.

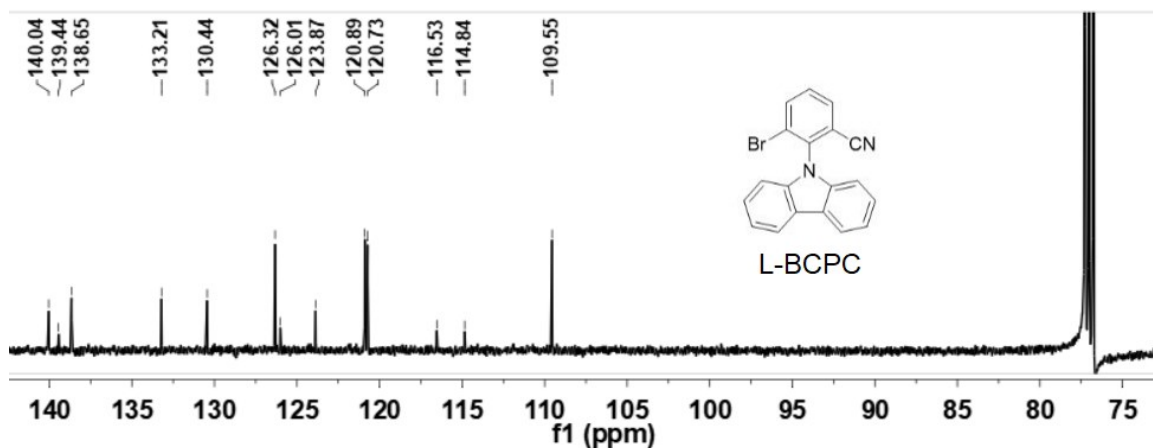

Figure S21.  $^{13}\text{C}$  NMR spectrum of L-BCPC in  $\text{CDCl}_3$ .

## Reference

- 1 Y. Wang, Z. Zhang, L. Liu, S. Yuan, J. Ma, D. Liu, S. Xue, Q. Sun and W. Yang, Cyanophenylcarbazole isomers exhibiting different UV and visible light excitable room temperature phosphorescence, *J. Mater. Chem. C*, 2019, **7**, 9671-9677.
- 2 Z. An, C. Zheng, Y. Tao, R. Chen, H. Shi, T. Chen, Z. Wang, H. Li, R. Deng, X. Liu and W. Huang, Stabilizing triplet excited states for ultralong organic phosphorescence, *Nat. Mater.*, 2015, **14**, 685-690.
- 3 S.J. Yoon, J. H. Kim, K. S. Kim, J. W. Chung, B. Heinrich, F. Mathevet, P. Kim, B. Donnio, A.-J. Attias, D. Kim and S. Y. Park, Mesomorphic Organization and Thermochromic Luminescence of Dicyanodistyrylbenzene-Based Phasmidic Molecular Disks: Uniaxially Aligned Hexagonal Columnar Liquid Crystals at Room Temperature with Enhanced Fluorescence Emission and Semiconductivity, *Adv. Funct. Mater.*, 2012, **22**, 61-69.
- 4 C. C. Byeon, M. M. McKerns, W. Sun, T. M. Nordlund, C. M. Lawson and G. M. Gray, Excited state lifetime and intersystem crossing rate of asymmetric pentaazadentate porphyrin-like metal complexes, *Appl. Phys. Lett.*, 2004, **84**, 5174-5176.
- 5 P. C. Y. Chow, S. Albert-Seifried, S. Gélinas and R. H. Friend, Nanosecond Intersystem Crossing Times in Fullerene Acceptors: Implications for Organic Photovoltaic Diodes, *Adv. Mater.*, 2014, **26**, 4851-4854.
